# Supplementary material
Source: Springer Nature journal article supplement (https://www.springerprofessional.de/resource/supplementary/40702_2017_320_MOESM2_ESM.pdf/12236582)
Supplement: MOESM2 [file 12236582]

## INTERVIEWLEITFADEN

### Der Chief Digital Officer (CDO) – eine neuartige Management-Position

Ziel der Arbeit ist die Rolle des CDO in Deutschland, Österreich und der Schweiz zu analysieren. Konkret sollen folgende Fragen geklärt werden:

*Wie sieht die Stelle der neuartigen Position des Chief Digital Officers aus?*

→ *Welche Aufgaben erfüllt der Chief Digital Officer?*

→ *Welche Anforderungen werden an den Chief Digital Officer gestellt?*

→ *Wo ist die Stelle des Chief Digital Officers in einer Unternehmensorganisation eingeordnet?*

---

Gesprächspartner: \_\_\_\_\_

Kontaktdaten: \_\_\_\_\_

Ort: \_\_\_\_\_

Datum: \_\_\_\_\_

### Einleitung

Begrüßung, Vorstellung, Einverständnis zur Aufzeichnung des Gespräches

### Fragen an den CDO

1. Wann wurde die Position des CDO im Unternehmen geschaffen?
2. Kennen Sie den Grund/die Intention des Unternehmens zur Schaffung dieser Position?
3. Wie wurde die Position des CDO in Ihrem Unternehmen ausgeschrieben?  
Öffentliche Ausschreibung (Print, ...), Interne Ausschreibung, Headhunting, Personalberater, ...?
4. Welche wichtigen/prägenden Karrierestationen können Sie nennen?
5. Welche Ausbildung haben Sie?
6. Welche Aufgaben übernehmen Sie als CDO?
7. Für welche Bereiche im Unternehmen sind Sie verantwortlich?
8. Aus wie vielen Personen besteht Ihr Team?  
Welche Aufgaben übernehmen die Teammitglieder?
9. Welche Anforderungen werden an Sie gestellt?
10. Welche Soft-Skills erachten Sie als wesentlich in Ihrem Job?

11. Gibt es Wissensbereiche, die Ihnen helfen würden, den Job besser zu machen?
12. Gibt es eine Stellenbeschreibung Ihres Jobs im Unternehmen?
13. Gibt es bei Ihrer tatsächlichen Tätigkeit Unterschiede zur Stellenbeschreibung?
14. Wer im Unternehmen ist bei strategischen Entscheidungen miteingebunden?  
Sind Sie in strategische Entscheidungen miteingebunden?
15. Mit wem aus dem Management haben Sie die meisten Schnittstellen/Arbeitskontakte?
16. Wem sind Sie unterstellt? (Organigramm?)
17. Wie sieht Ihre Zusammenarbeit mit dem CIO aus?
18. Wo sehen Sie die wesentlichen Unterschiede im Aufgabenbereich zwischen CDO und CIO?
19. Wo sehen Sie gemeinsame Aufgabenbereiche?
20. Welche unterschiedlichen Anforderungen sehen Sie zwischen CDO und CIO?
21. Wo im Unternehmen ist der CIO eingeordnet?

## Abschluss

Besteht Interesse an den Ergebnissen?
